# Supplementary material for: Characterization of black carbon and silica nanoparticle interactions with human plasma proteins
Source: Royal Society of Chemistry journal article supplement (doi:10.1039/d3en00773a), 2024-01-01
Supplement: d3en00773a1.pdf [file d3en00773a1.pdf]

## Supplementary information

### Characterization of black carbon and silica nanoparticles interactions with human plasma proteins

Si-si Chen,<sup>a</sup> Hong-juan Chen,<sup>b</sup> Xue-wen Guo,<sup>a</sup> Wei-juan Zheng<sup>b</sup> and Hong-zhen Lian

\*a,

<sup>a</sup> *State Key Laboratory of Analytical Chemistry for Life Science, School of Chemistry & Chemical Engineering and Center of Materials Analysis, Nanjing University, Nanjing 210023, China*

<sup>b</sup> *State Key Laboratory of Pharmaceutical Biotechnology, School of Life Science, Nanjing University, Nanjing 210023, China*

*\*Corresponding authors. State Key Laboratory of Analytical Chemistry for Life Science, School of Chemistry & Chemical Engineering and Center of Materials Analysis, Nanjing University, 163 Xianlin Avenue, Nanjing 210023, China. E-mail: hzlian@nju.edu.cn (H. Z. Lian).*

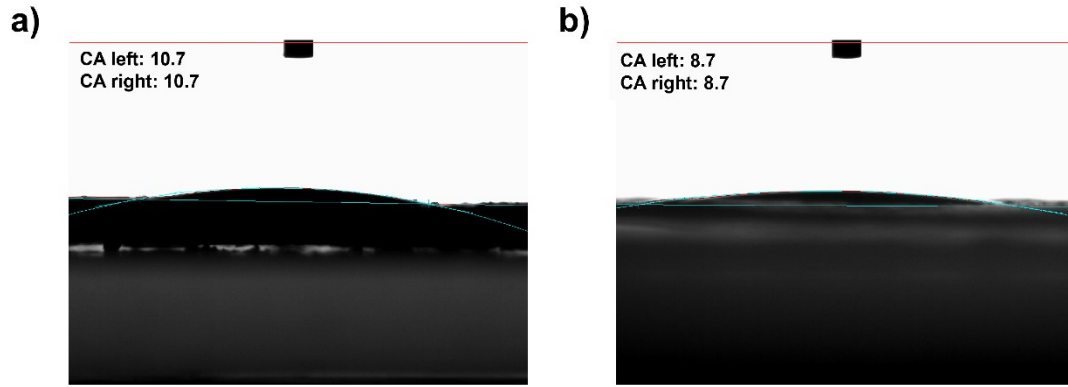

**Fig. S1.** Contact angles of BC NPs (a) and SiO<sub>2</sub> NPs (b) at 1000 ms after water droplet deposition.

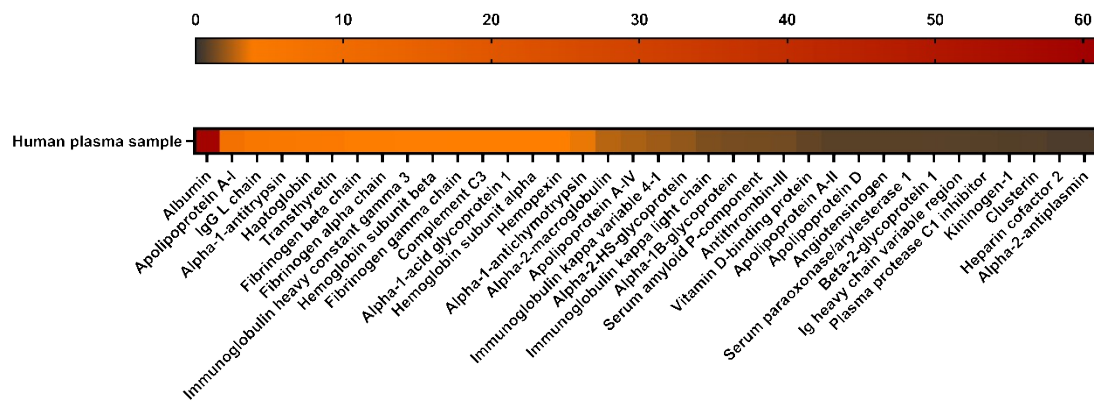

**Fig. S2.** Heat map of the major protein compositions of the human plasma sample.
